# Supplementary material for: How Small and Medium-Sized Enterprises Can Uptake the Sustainable Development Goals through a Cluster Management Organization: A Case Study
Source: MDPI journal article supplement (doi:10.3390/su13115939), 2021-05-25
Supplement: s1 [file s1]

| Lehi-ODS Category  | Q# | SDG Target | GRI Topic Specific Standard | Question                                                                                                             | Possible Answers                       |
|--------------------|----|------------|-----------------------------|----------------------------------------------------------------------------------------------------------------------|----------------------------------------|
| People (Employees) | 1  | 3.2        | 401-2                       | Health benefits offered to the majority of our employees include: <i>choose all answers that apply</i>               | Nothing specific                       |
|                    |    |            |                             |                                                                                                                      | Life Insurance                         |
|                    |    |            |                             |                                                                                                                      | Disability Coverage                    |
|                    |    |            |                             |                                                                                                                      | Accident insurance                     |
|                    |    |            |                             |                                                                                                                      | Private Dental Insurance               |
|                    |    |            |                             |                                                                                                                      | Private Health Insurance               |
|                    | 2  | 3.3        | 403-10                      | % of employees having suffered work-related ill health in the last year: <i>choose only 1 answer</i>                 | Less than 5%                           |
|                    |    |            |                             |                                                                                                                      | 6-20%                                  |
|                    |    |            |                             |                                                                                                                      | 21-40%                                 |
|                    |    |            |                             |                                                                                                                      | 41-60%                                 |
|                    |    |            |                             |                                                                                                                      | 61-80%                                 |
|                    |    |            |                             |                                                                                                                      | 81-100%                                |
|                    | 3  | 3.3        | 403-9                       | % of employees having suffered work-related injuries in the last year: <i>choose only 1 answer</i>                   | Less than 5%                           |
|                    |    |            |                             |                                                                                                                      | 6-20%                                  |
|                    |    |            |                             |                                                                                                                      | 21-40%                                 |
|                    |    |            |                             |                                                                                                                      | 41-60%                                 |
|                    |    |            |                             |                                                                                                                      | 61-80%                                 |
|                    |    |            |                             |                                                                                                                      | 81-100%                                |
|                    | 4  | 3.5        | 403-6                       | The training offered to employees on health and safety issues includes: <i>choose all answers that apply</i>         | Nothing specific                       |
|                    |    |            |                             |                                                                                                                      | Brief training upon joining            |
|                    |    |            |                             |                                                                                                                      | Yearly training for all employees      |
|                    |    |            |                             |                                                                                                                      | Specific training by work area         |
|                    | 5  | 3.2        | 401-2                       | The social benefits our company offers to employees include: <i>choose all answers that apply</i>                    | Nothing specific                       |
|                    |    |            |                             |                                                                                                                      | Kindergarden (voucher)                 |
|                    |    |            |                             |                                                                                                                      | Lunch (voucher)                        |
|                    |    |            |                             |                                                                                                                      | Transport (voucher)                    |
|                    |    |            |                             |                                                                                                                      | Discount on the company's products     |
|                    |    |            |                             |                                                                                                                      | General wellness services              |
|                    | 6  | 5.1        | 405-1                       | To avoid inequalities between women/men, management analyzes information about: <i>choose all answers that apply</i> | Remuneration (salary)                  |
|                    |    |            |                             |                                                                                                                      | Remuneration by professional category  |
|                    |    |            |                             |                                                                                                                      | Social and health benefits             |
|                    |    |            |                             |                                                                                                                      | Investment in training courses         |
|                    |    |            |                             |                                                                                                                      | Professional promotion                 |
|                    |    |            |                             |                                                                                                                      | None of the above                      |
|                    | 7  | 5.1        | 405-2                       | The difference between the average gross annual salary of men and women is: <i>choose only 1 answer</i>              | No difference                          |
|                    |    |            |                             |                                                                                                                      | 1-10%                                  |
|                    |    |            |                             |                                                                                                                      | 11-20%                                 |
|                    |    |            |                             |                                                                                                                      | 21-30%                                 |
|                    |    |            |                             |                                                                                                                      | Over 30%                               |
|                    |    |            |                             |                                                                                                                      | Not available                          |
|                    | 8  | 5.1        | 405-1                       | Women make up over 40% of: <i>choose all answers that apply</i>                                                      | High management staff                  |
|                    |    |            |                             |                                                                                                                      | Middle managers                        |
|                    |    |            |                             |                                                                                                                      | Direct labor                           |
|                    |    |            |                             |                                                                                                                      | Indirect labor                         |
|                    |    |            |                             |                                                                                                                      | Total staff                            |
|                    |    |            |                             |                                                                                                                      | None of the above                      |
|                    | 9  | 5.1        | 406-1                       | Company policies on equality are specified in: <i>choose all answers that apply</i>                                  | Nothing specific                       |
|                    |    |            |                             |                                                                                                                      | Equality plan                          |
|                    |    |            |                             |                                                                                                                      | Harassment and discrimination protocol |

|                                          |      |       |                                                                                                                   |                                                                                                                                                 |                                                         |
|------------------------------------------|------|-------|-------------------------------------------------------------------------------------------------------------------|-------------------------------------------------------------------------------------------------------------------------------------------------|---------------------------------------------------------|
|                                          |      |       |                                                                                                                   |                                                                                                                                                 | Hiring process                                          |
|                                          | 10   | 8.5   | 401-3                                                                                                             | For family/life and work balance we have:<br><i>choose all answers that apply</i>                                                               | Nothing specific                                        |
|                                          |      |       |                                                                                                                   |                                                                                                                                                 | What the law says                                       |
|                                          |      |       |                                                                                                                   |                                                                                                                                                 | Additional time flexibility                             |
|                                          |      |       |                                                                                                                   |                                                                                                                                                 | Work from home some days a week                         |
|                                          |      |       |                                                                                                                   |                                                                                                                                                 | No extra hours/overtime                                 |
|                                          |      |       |                                                                                                                   |                                                                                                                                                 | Individually defined plans                              |
|                                          |      |       |                                                                                                                   |                                                                                                                                                 |                                                         |
|                                          | 11   | 8.5   | 401-2                                                                                                             | To avoid inequalities between permanent and temporary employees, management analyzes information about:<br><i>choose all answers that apply</i> | Remuneration (salary)                                   |
|                                          |      |       |                                                                                                                   |                                                                                                                                                 | Remuneration by professional category                   |
|                                          |      |       |                                                                                                                   |                                                                                                                                                 | Social and health benefits                              |
|                                          |      |       |                                                                                                                   |                                                                                                                                                 | None of the above                                       |
|                                          | 12   | 8.5   | 404-1                                                                                                             | For employee training we do:<br><i>choose all answers that apply</i>                                                                            | Nothing specific                                        |
|                                          |      |       |                                                                                                                   |                                                                                                                                                 | Training plan for everybody                             |
|                                          |      |       |                                                                                                                   |                                                                                                                                                 | Allocate an annual budget                               |
|                                          |      |       |                                                                                                                   |                                                                                                                                                 | Training in external work issues                        |
|                                          |      |       |                                                                                                                   |                                                                                                                                                 | External training demanded by the employee              |
|                                          |      |       |                                                                                                                   |                                                                                                                                                 | Internal promotion plan                                 |
|                                          | 13   | 8.5   | 404-1                                                                                                             | The average annual training hours (h) per employee is:<br><i>choose only 1 answer</i>                                                           | Less than 25h                                           |
|                                          |      |       |                                                                                                                   |                                                                                                                                                 | Between 25 and 50 h                                     |
|                                          |      |       |                                                                                                                   |                                                                                                                                                 | Between 50 and 100h                                     |
|                                          |      |       |                                                                                                                   |                                                                                                                                                 | More than 100h                                          |
|                                          | 14   | 8.2   | 201-3                                                                                                             | Employee participation in company's profits:<br><i>choose all answers that apply</i>                                                            | Nothing specific                                        |
|                                          |      |       |                                                                                                                   |                                                                                                                                                 | Profit bonus for managers                               |
|                                          |      |       |                                                                                                                   |                                                                                                                                                 | Profit bonus for other employees                        |
|                                          |      |       |                                                                                                                   |                                                                                                                                                 | Corporate ownership by managers                         |
|                                          |      |       |                                                                                                                   |                                                                                                                                                 | Corporate ownership by other employees                  |
|                                          |      |       |                                                                                                                   |                                                                                                                                                 | Corporate ownership by more than 50% of the total staff |
|                                          | 15   | 8.8   | 402-1                                                                                                             | Employees participate in the decision-making of:<br><i>choose all answers that apply</i>                                                        | Nothing specific                                        |
|                                          |      |       |                                                                                                                   |                                                                                                                                                 | Most management decisions                               |
|                                          |      |       |                                                                                                                   |                                                                                                                                                 | Human resources issues                                  |
|                                          |      |       |                                                                                                                   |                                                                                                                                                 | Non-strategic actions                                   |
| Relationships within the local community |      |       |                                                                                                                   |                                                                                                                                                 |                                                         |
| Solidarity action of the company         |      |       |                                                                                                                   |                                                                                                                                                 |                                                         |
| 16                                       | 8.5  | 405-1 | We promote the training of local young people by:<br><i>choose all answers that apply</i>                         | Offering internships and End-of-Degree/Masters projects                                                                                         |                                                         |
|                                          |      |       |                                                                                                                   | Prioritizing their hiring                                                                                                                       |                                                         |
|                                          |      |       |                                                                                                                   | Prioritizing the vulnerable/disadvantaged                                                                                                       |                                                         |
|                                          |      |       |                                                                                                                   | Nothing specific                                                                                                                                |                                                         |
| 17                                       | 10.3 | 406-1 | The "non-discrimination" and diversity policy in the company is realized in: <i>choose all answers that apply</i> | People with disabilities in the workforce                                                                                                       |                                                         |
|                                          |      |       |                                                                                                                   | People from vulnerable/disadvantaged groups in the workforce                                                                                    |                                                         |
|                                          |      |       |                                                                                                                   | Special prices for vulnerable/disadvantaged groups                                                                                              |                                                         |
|                                          |      |       |                                                                                                                   | Use of 2 co-official languages                                                                                                                  |                                                         |
|                                          |      |       |                                                                                                                   | More than 20% foreign employees                                                                                                                 |                                                         |
|                                          |      |       |                                                                                                                   | Nothing specific                                                                                                                                |                                                         |
| <b>Production Process</b>                | 18   | 7.2   | 302-1                                                                                                             | The measures we take to increase renewable energy                                                                                               | No measures                                             |
|                                          |      |       |                                                                                                                   |                                                                                                                                                 | Renewable energy production                             |

|    |      |       |                                                                                                                         |                                               |
|----|------|-------|-------------------------------------------------------------------------------------------------------------------------|-----------------------------------------------|
|    |      |       | consumption are: <i>choose all answers that apply</i>                                                                   | Electricity use from renewable sources        |
|    |      |       |                                                                                                                         | Reduction of gas/gasoil consumption           |
| 19 | 7.2  | 302-1 | % of total energy from renewable sources:<br><i>choose only 1 answer</i>                                                | I don't know                                  |
|    |      |       |                                                                                                                         | 0                                             |
|    |      |       |                                                                                                                         | 1-25%                                         |
|    |      |       |                                                                                                                         | 26-50%                                        |
|    |      |       |                                                                                                                         | 51-75%                                        |
|    |      |       |                                                                                                                         | 76-100%                                       |
| 20 | 7.3  | 302-4 | Over the past 3 years, measures taken to improve energy efficiency include: <i>choose all answers that apply</i>        | No measures                                   |
|    |      |       |                                                                                                                         | Very efficient machinery                      |
|    |      |       |                                                                                                                         | Consumption monitoring                        |
|    |      |       |                                                                                                                         | Efficient lighting                            |
|    |      |       |                                                                                                                         | Annual budget in efficiency                   |
|    |      |       |                                                                                                                         | Other efficiency measures                     |
| 21 | 12.2 | 301-1 | Actions taken to reduce raw material consumption include: <i>choose all answers that apply</i>                          | Key RM monitoring                             |
|    |      |       |                                                                                                                         | Investment in fixed assets                    |
|    |      |       |                                                                                                                         | Annual budget in efficiency                   |
|    |      |       |                                                                                                                         | Efficiency improvement identification         |
|    |      |       |                                                                                                                         | Eco-design process                            |
|    |      |       |                                                                                                                         | None of the above                             |
| 22 | 12.2 | 301-1 | In the last 3 years we have managed to reduce the consumption of raw materials: <i>choose only 1 answer</i>             | No                                            |
|    |      |       |                                                                                                                         | Yes, but slightly                             |
|    |      |       |                                                                                                                         | Yes, in some raw materials                    |
|    |      |       |                                                                                                                         | Yes, in most raw materials                    |
| 23 | 12.2 | 301-1 | % of raw materials from sustainable or recycled sources: <i>choose only 1 answer</i>                                    | 0-5%                                          |
|    |      |       |                                                                                                                         | 6-35%                                         |
|    |      |       |                                                                                                                         | 36-70%                                        |
|    |      |       |                                                                                                                         | 71-100%                                       |
| 24 | 12.4 | 306-2 | Actions taken to manage and minimize waste include: <i>choose all answers that apply</i>                                | Waste management protocol                     |
|    |      |       |                                                                                                                         | Investments to recover/recuperate residue     |
|    |      |       |                                                                                                                         | Revaluation of residue                        |
|    |      |       |                                                                                                                         | Collaboration with waste management companies |
|    |      |       |                                                                                                                         | Residue monitoring                            |
|    |      |       |                                                                                                                         | None of the above                             |
| 25 | 13.1 | 201-2 | The % of annual turnover from more sustainable products developed over the past 5 years is: <i>choose only 1 answer</i> | 0-5%                                          |
|    |      |       |                                                                                                                         | 6-20%                                         |
|    |      |       |                                                                                                                         | 21-40%                                        |
|    |      |       |                                                                                                                         | More than 40%                                 |
| 26 | 13.1 | 305-1 | We calculate emissions: <i>choose all answers that apply</i>                                                            | Direct from the manufacturing process         |
|    |      |       |                                                                                                                         | Derived from electricity consumption          |
|    |      |       |                                                                                                                         | Of the product distribution                   |
|    |      |       |                                                                                                                         | Of suppliers                                  |
|    |      |       |                                                                                                                         | Of the employees' business trips              |
|    |      |       |                                                                                                                         | None of the above                             |
| 27 | 13.1 | 305-5 | We offset emissions: <i>choose all answers that apply</i>                                                               | Direct from the manufacturing process         |
|    |      |       |                                                                                                                         | Derived from electricity consumption          |
|    |      |       |                                                                                                                         | Of the product distribution                   |
|    |      |       |                                                                                                                         | Of suppliers                                  |

|                       |    |      |       |                                                                                                                                  |                                                     |
|-----------------------|----|------|-------|----------------------------------------------------------------------------------------------------------------------------------|-----------------------------------------------------|
|                       |    |      |       |                                                                                                                                  | Of the employees' business trips                    |
|                       |    |      |       |                                                                                                                                  | None of the above                                   |
|                       | 28 | 15.1 | 301-1 | The % of wood and cardboard of sustainable (FSC, PEFC,...) and recycled origin is:<br><i>choose only 1 answer</i>                | We do not use wood or cardboard                     |
|                       |    |      |       |                                                                                                                                  | 0                                                   |
|                       |    |      |       |                                                                                                                                  | 1-25%                                               |
|                       |    |      |       |                                                                                                                                  | 26-50%                                              |
|                       |    |      |       |                                                                                                                                  | 51-75%                                              |
|                       |    |      |       |                                                                                                                                  | 76-100%                                             |
|                       | 29 | 15.1 | 303-3 | Over the past 3 years, water conservation measures have included:<br><i>choose all answers that apply</i>                        | Consumption efficiency                              |
|                       |    |      |       |                                                                                                                                  | Rainwater collection                                |
|                       |    |      |       |                                                                                                                                  | Treatment of water used                             |
|                       |    |      |       |                                                                                                                                  | Reuse of water used                                 |
|                       |    |      |       |                                                                                                                                  | Monitoring of water consumed                        |
|                       |    |      |       |                                                                                                                                  | None of the above                                   |
|                       | 30 | 15.1 | 304-1 | The measures taken by the company for environmental protection and conservation include:<br><i>choose all answers that apply</i> | Donations to conservation entities                  |
|                       |    |      |       |                                                                                                                                  | Creation of green zones in our local area           |
|                       |    |      |       |                                                                                                                                  | Tree planting program                               |
|                       |    |      |       |                                                                                                                                  | We comply with the law                              |
| Customers & Suppliers | 31 | 8.8  | 414-1 | Our supplier policy provides for:<br><i>choose all answers that apply</i>                                                        | Socio-environmental audits                          |
|                       |    |      |       |                                                                                                                                  | Local supplier prioritization                       |
|                       |    |      |       |                                                                                                                                  | Involvement in collaborations & shared developments |
|                       |    |      |       |                                                                                                                                  | Price and quality prioritization                    |
|                       |    |      |       |                                                                                                                                  | Sustainability prioritization                       |
|                       |    |      |       |                                                                                                                                  | None of the above                                   |
|                       | 32 | 8.3  | 204-1 | % of purchase from independent local suppliers (<200Km) is:<br><i>choose only 1 answer</i>                                       | Below 20%                                           |
|                       |    |      |       |                                                                                                                                  | 21-40%                                              |
|                       |    |      |       |                                                                                                                                  | 41-60%                                              |
|                       |    |      |       |                                                                                                                                  | 61-80%                                              |
|                       |    |      |       |                                                                                                                                  | Above 80%                                           |
|                       |    |      |       |                                                                                                                                  | I don't know                                        |
|                       | 33 | 9.1  | 201-1 | The % annual turnover from products developed in the last 5 years is:<br><i>choose only 1 answer</i>                             | 0-5%                                                |
|                       |    |      |       |                                                                                                                                  | 6-20%                                               |
|                       |    |      |       |                                                                                                                                  | 21-40%                                              |
|                       |    |      |       |                                                                                                                                  | More than 40%                                       |
|                       | 34 | 9.5  | 201-1 | In the last 5 years we have collaborated on R&D projects with:<br><i>choose all answers that apply</i>                           | Technological Centers and Universities              |
|                       |    |      |       |                                                                                                                                  | Other companies from the industry                   |
|                       |    |      |       |                                                                                                                                  | Environmental companies                             |
|                       |    |      |       |                                                                                                                                  | Suppliers (except the above)                        |
|                       |    |      |       |                                                                                                                                  | Customers                                           |
|                       |    |      |       |                                                                                                                                  | None of the above                                   |
|                       | 35 | 9.5  | 201-1 | Over the past 5 years our R&D projects have focused on:<br><i>choose all answers that apply</i>                                  | Product lifecycle                                   |
|                       |    |      |       |                                                                                                                                  | Digital transformation                              |
|                       |    |      |       |                                                                                                                                  | Optimizing the use of natural resources             |
|                       |    |      |       |                                                                                                                                  | Sustainable manufacturing                           |
|                       |    |      |       |                                                                                                                                  | Inclusive jobs                                      |
|                       |    |      |       |                                                                                                                                  | None of the above                                   |
|                       | 36 | 10.3 | 406-1 | We collaborate with companies that employ mostly people with                                                                     | Hiring                                              |
|                       |    |      |       |                                                                                                                                  | Job adaptation                                      |

|                       |    |      |                                                                        |                                                                                                                      |
|-----------------------|----|------|------------------------------------------------------------------------|----------------------------------------------------------------------------------------------------------------------|
|                       |    |      | disabilities or exclusion for:<br><i>choose all answers that apply</i> | Outsourcing                                                                                                          |
|                       |    |      |                                                                        | Collaboration in their training                                                                                      |
|                       |    |      |                                                                        | I have not thought about it                                                                                          |
|                       |    |      |                                                                        | Nothing specific                                                                                                     |
|                       | 37 | 12.2 | 301-2                                                                  | Actions taken to reduce the impact of product life include:<br><i>choose all answers that apply</i>                  |
|                       |    |      |                                                                        | Longer product life                                                                                                  |
|                       |    |      |                                                                        | Afterlife recovery program                                                                                           |
|                       |    |      |                                                                        | Ecodesign to reduce end user waste                                                                                   |
|                       |    |      |                                                                        | Service/repair process                                                                                               |
|                       |    |      |                                                                        | Lifecycle analysis                                                                                                   |
|                       |    |      |                                                                        | None of the above                                                                                                    |
|                       | 38 | 12.8 | 417-1                                                                  | We have carried out environmental certification processes with:<br><i>choose all answers that apply</i>              |
|                       |    |      |                                                                        | ISO 14001                                                                                                            |
|                       |    |      |                                                                        | Environmental Product Declaration                                                                                    |
|                       |    |      |                                                                        | Cradle to Cradle                                                                                                     |
|                       |    |      |                                                                        | None of the above                                                                                                    |
|                       | 39 | 12.8 | 417-1                                                                  | The % of sales that come from products/services with environmental certifications is:<br><i>choose only 1 answer</i> |
|                       |    |      |                                                                        | 0-5%                                                                                                                 |
|                       |    |      |                                                                        | 6-35%                                                                                                                |
|                       |    |      |                                                                        | 36-70%                                                                                                               |
|                       |    |      |                                                                        | 71-100%                                                                                                              |
|                       | 40 | 12.2 | 308-2                                                                  | We work with suppliers to reduce the environmental impact:<br><i>choose all answers that apply</i>                   |
|                       |    |      |                                                                        | No. We trust their work                                                                                              |
|                       |    |      |                                                                        | We cannot. All suppliers are large companies                                                                         |
|                       |    |      |                                                                        | We ask SMEs for data                                                                                                 |
|                       |    |      |                                                                        | We collaborate in the efficiency of the SMEs                                                                         |
|                       |    |      |                                                                        | We help SMEs in design                                                                                               |
|                       |    |      |                                                                        | We audit their efficiency                                                                                            |
|                       | 41 | 15.1 | 301-1                                                                  | We have taken the following sustainability measures in packaging:<br><i>choose all answers that apply</i>            |
|                       |    |      |                                                                        | Redesign to reduce volume                                                                                            |
|                       |    |      |                                                                        | Reduction of packaging consumption                                                                                   |
|                       |    |      |                                                                        | Elimination of plastics                                                                                              |
|                       |    |      |                                                                        | Sustainable or recycled materials                                                                                    |
|                       |    |      |                                                                        | Instructions for the customer to recycle/recuperate                                                                  |
|                       |    |      |                                                                        | None of the above                                                                                                    |
| Community<br>(Social) | 42 | 16.3 | 205                                                                    | To prevent corruption and bribery we have:<br><i>choose all answers that apply</i>                                   |
|                       |    |      |                                                                        | Internal financial audits                                                                                            |
|                       |    |      |                                                                        | Formalized ethical code                                                                                              |
|                       |    |      |                                                                        | Training for employees                                                                                               |
|                       |    |      |                                                                        | Formalized reporting policy                                                                                          |
|                       |    |      |                                                                        | Compliance manual                                                                                                    |
|                       |    |      |                                                                        | Nothing specific                                                                                                     |
|                       | 43 | 4.4  | 404-1                                                                  | We have an ongoing collaboration with:<br><i>choose all answers that apply</i>                                       |
|                       |    |      |                                                                        | Nothing specific                                                                                                     |
|                       |    |      |                                                                        | Schools                                                                                                              |
|                       |    |      |                                                                        | Further education colleges                                                                                           |
|                       |    |      |                                                                        | Universities                                                                                                         |
|                       | 44 | 4.4  | 404-1                                                                  | This collaboration includes:<br><i>choose all answers that apply</i>                                                 |
|                       |    |      |                                                                        | Nothing specific                                                                                                     |
|                       |    |      |                                                                        | Factory visits                                                                                                       |
|                       |    |      |                                                                        | Company internships                                                                                                  |
|                       |    |      |                                                                        | End-of-Degree/Masters projects at the company                                                                        |
|                       |    |      |                                                                        | Doctoral thesis at the company                                                                                       |
|                       |    |      |                                                                        | Contests/challenges for the students                                                                                 |
|                       | 45 | 4.4  | 404-1                                                                  | We additionally collaborate:<br><i>choose all answers that apply</i>                                                 |
|                       |    |      |                                                                        | Nothing specific                                                                                                     |
|                       |    |      |                                                                        | With job offers to students                                                                                          |
|                       |    |      |                                                                        | With education grants                                                                                                |

|    |      |       |                                                                                                                    |                                              |
|----|------|-------|--------------------------------------------------------------------------------------------------------------------|----------------------------------------------|
|    |      |       |                                                                                                                    | Teaching at educational centers              |
| 46 | 10.3 | 401-1 | We collaborate with social projects in: <i>choose all answers that apply</i>                                       | Poverty reduction                            |
|    |      |       |                                                                                                                    | Child education                              |
|    |      |       |                                                                                                                    | Sports sponsorship                           |
|    |      |       |                                                                                                                    | Employee proposals                           |
|    |      |       |                                                                                                                    | Employee volunteering                        |
|    |      |       |                                                                                                                    | Nothing specific                             |
| 47 | 11.2 | 413-1 | We support the development of our local community by: <i>choose all answers that apply</i>                         | Nothing specific                             |
|    |      |       |                                                                                                                    | Donating to social entities                  |
|    |      |       |                                                                                                                    | Searching for social projects to support     |
|    |      |       |                                                                                                                    | Allocating an annual budget                  |
|    |      |       |                                                                                                                    | Financing specific areas                     |
| 48 | 11.6 | 203-1 | Measures taken to reduce pollution from commuting include: <i>choose all answers that apply</i>                    | Aligning donations and company strategy      |
|    |      |       |                                                                                                                    | No measures                                  |
|    |      |       |                                                                                                                    | Awareness-raising actions                    |
|    |      |       |                                                                                                                    | Facilitating work from home                  |
|    |      |       |                                                                                                                    | Carsharing or carpooling programs            |
|    |      |       |                                                                                                                    | Incentive to use bicycle or public transport |
| 49 | 11.3 | 415-1 | We collaborate with the following entities: <i>choose all answers that apply</i>                                   | More sustainable company-cars                |
|    |      |       |                                                                                                                    | Cluster / Business Associations              |
|    |      |       |                                                                                                                    | Other companies from the industry            |
|    |      |       |                                                                                                                    | Competitors                                  |
|    |      |       |                                                                                                                    | Public Administration                        |
|    |      |       |                                                                                                                    | Strategic alliances with some of the above   |
| 50 | 11.6 | 304-2 | At least 20% of sales come from products/services that clearly contribute to: <i>choose all answers that apply</i> | None of the above                            |
|    |      |       |                                                                                                                    | Having more sustainable buildings            |
|    |      |       |                                                                                                                    | Having safer buildings                       |
|    |      |       |                                                                                                                    | Having friendlier cities                     |
|    |      |       |                                                                                                                    | Giving new life to waste                     |
|    |      |       |                                                                                                                    | Reducing customer emissions                  |
| 51 | 16.1 | 201-1 | We communicate, in a public and transparent manner, information about: <i>choose all answers that apply</i>        | None of the above                            |
|    |      |       |                                                                                                                    | Economic performance                         |
|    |      |       |                                                                                                                    | Social performance                           |
|    |      |       |                                                                                                                    | Environmental performance                    |
|    |      |       |                                                                                                                    | Company ownership                            |
| 52 | 16.1 | 207-3 | Company information is available: <i>choose all answers that apply</i>                                             | None of the above                            |
|    |      |       |                                                                                                                    | To all staff                                 |
|    |      |       |                                                                                                                    | On the web                                   |
|    |      |       |                                                                                                                    | In monthly internal newsletter               |
|    |      |       |                                                                                                                    | In annual internal newsletter                |
|    |      |       |                                                                                                                    | Upon staff request                           |
|    |      |       |                                                                                                                    | None of the above                            |
